# Supplementary material
Source: publisher site journal article supplement (https://thieme-connect.com/media/10.1055-s-00035024/201102/supmat/10-1160-th10-10-0660-supp.pdf)

## **Supplementary Material to Dentali et al. “Use of statins and recurrence of atrial fibrillation after catheter ablation or electrical cardioversion” (Thromb Haemost 2011; 106.2)**

### Appendix 1. Embase search strategy

Database: EMBASE <1980 to 2010 Week 02>

Search Strategy:

- 
- 1 heart atrium fibrillation/ (30531)
  - 2 statin/ (2208)
  - 3 hydroxymethylglutaryl coenzyme A reductase inhibitor/ (28161)
  - 4 Simvastatin/ (16435)
  - 5 Lovastatin/ (9590)
  - 6 Pravastatin/ (11446)
  - 7 rosuvastatin/ (3271)
  - 8 atorvastatin/ (13263)
  - 9 fluvastatin.tw. (1270)
  - 10 rosuvastatin.tw. (903)
  - 11 atorvastatin.tw. (3349)
  - 12 simvastatin.tw. (4521)
  - 13 lovastatin.tw. (2761)
  - 14 pravastatin.tw. (2889)
  - 15 2 or 3 or 4 or 5 or 6 or 7 or 8 or 9 or 10 or 11 or 12 or 13 or 14 (50714)
  - 16 1 and 15 (1356)

Appendix 2. Selection process

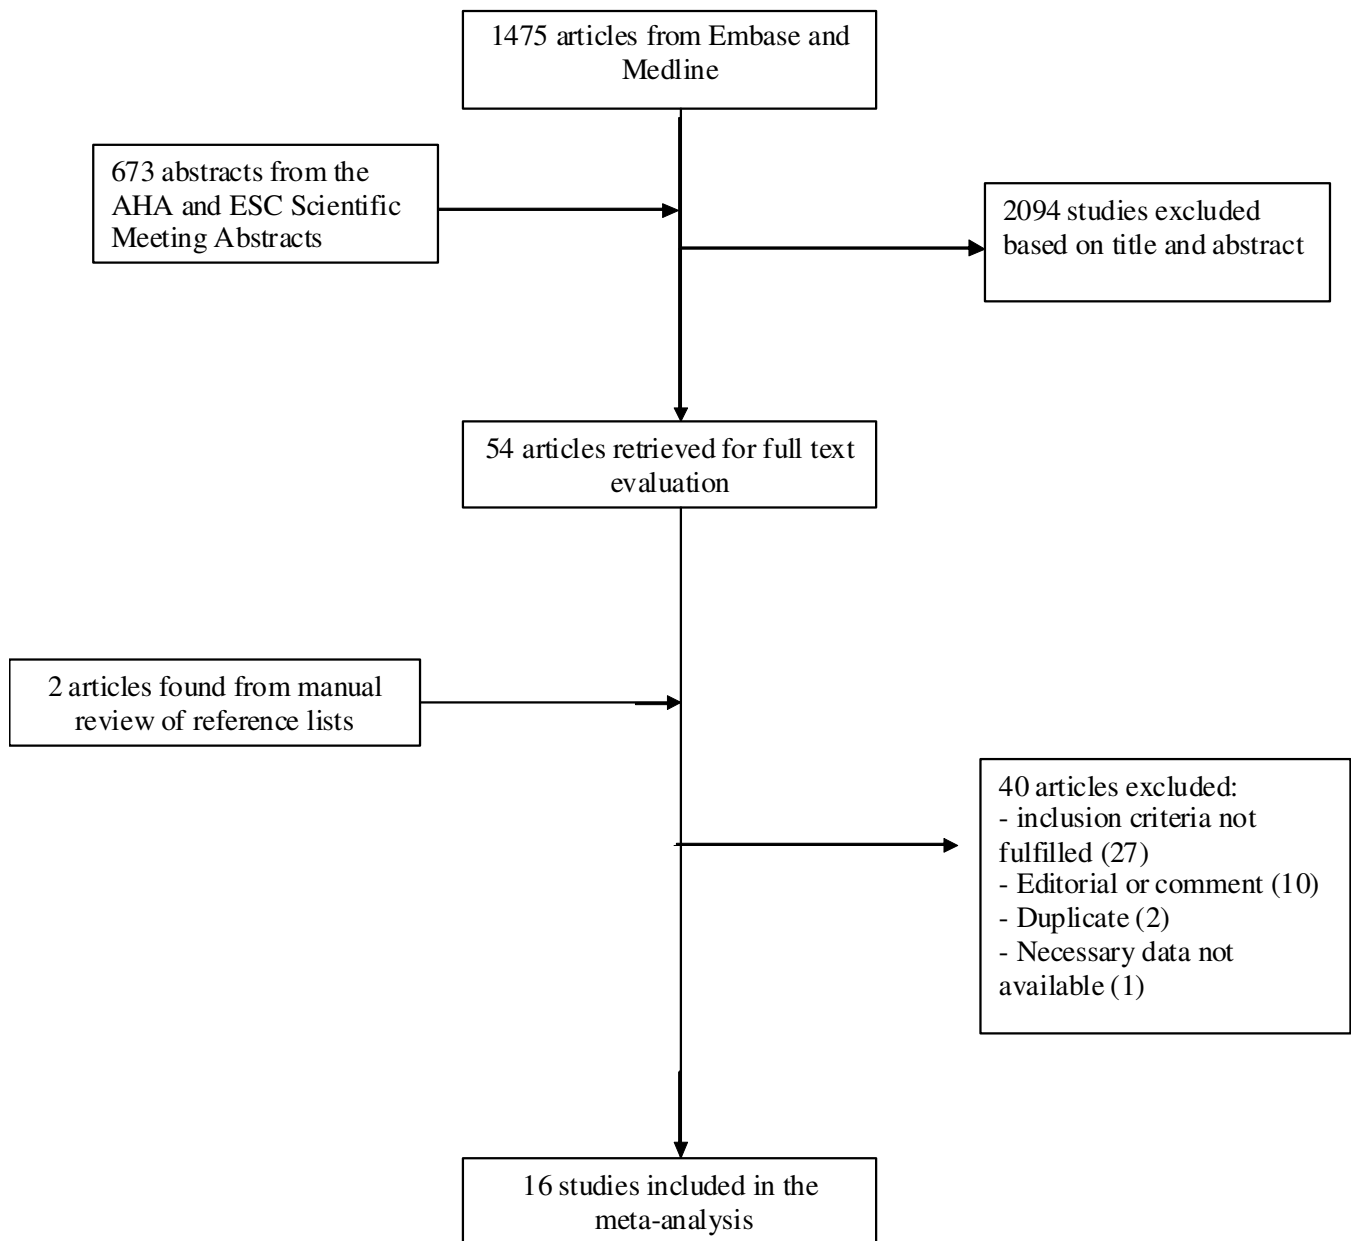

Appendix 3. Quality Assessment of included studies

| Study             | Cohort studies |                   |                   | Randomized controlled trials |              |                        |                         |                   |
|-------------------|----------------|-------------------|-------------------|------------------------------|--------------|------------------------|-------------------------|-------------------|
|                   | Type of study  | Patient selection | Lost to Follow-up | Randomization                | Double-blind | Allocation concealment | Withdrawals description | Lost to Follow-up |
| Humphries, 2007   | Prospective    | ND                | ND                |                              |              |                        |                         |                   |
| Dogan, 2009       | Prospective    | ND                | ND                |                              |              |                        |                         |                   |
| Siu, 2003         | Retrospective  | Consecutive       | 0                 |                              |              |                        |                         |                   |
| Kim, 2009         | Retrospective  | ND                | ND                |                              |              |                        |                         |                   |
| Richter, 2007     | Retrospective  | NC                | ND                |                              |              |                        |                         |                   |
| Koyama, 2009      | Retrospective  | ND                | ND                |                              |              |                        |                         |                   |
| Al Chekatie, 2007 | Retrospective  | Consecutive       | 0                 |                              |              |                        |                         |                   |
| Park, 2009        | Retrospective  | Non consecutive   | ND                |                              |              |                        |                         |                   |
| Naji, 2009        | Retrospective  | Consecutive       | 8                 |                              |              |                        |                         |                   |
| Watanabe, 2005    | Retrospective  | Consecutive       | ND                |                              |              |                        |                         |                   |
| Almroth, * 2009   |                |                   |                   | Yes                          | Yes          | Yes                    | Yes                     | 0                 |
| Tveit, 2004       |                |                   |                   | Yes                          | No           | ND                     | No                      | ND                |
| Ozaydin, 2006     |                |                   |                   | Yes                          | No           | ND                     | No                      | 0                 |

|             |               |             |   |     |    |    |    |   |
|-------------|---------------|-------------|---|-----|----|----|----|---|
| Xia, 2009   |               |             |   | Yes | No | ND | No | 0 |
| Can, 2007   |               |             |   | Yes | No | ND | No | 0 |
| Baman, 2009 | Retrospective | Consecutive | 0 |     |    |    |    |   |

\* Studies considered to be of high quality (see method section) Legend to table 2: ND, not declared; NC, not consecutive

Appendix 4. Funnel plot of relative risk versus standard error of studies evaluating the efficacy of statins in reducing recurrence after electrical cardioversion

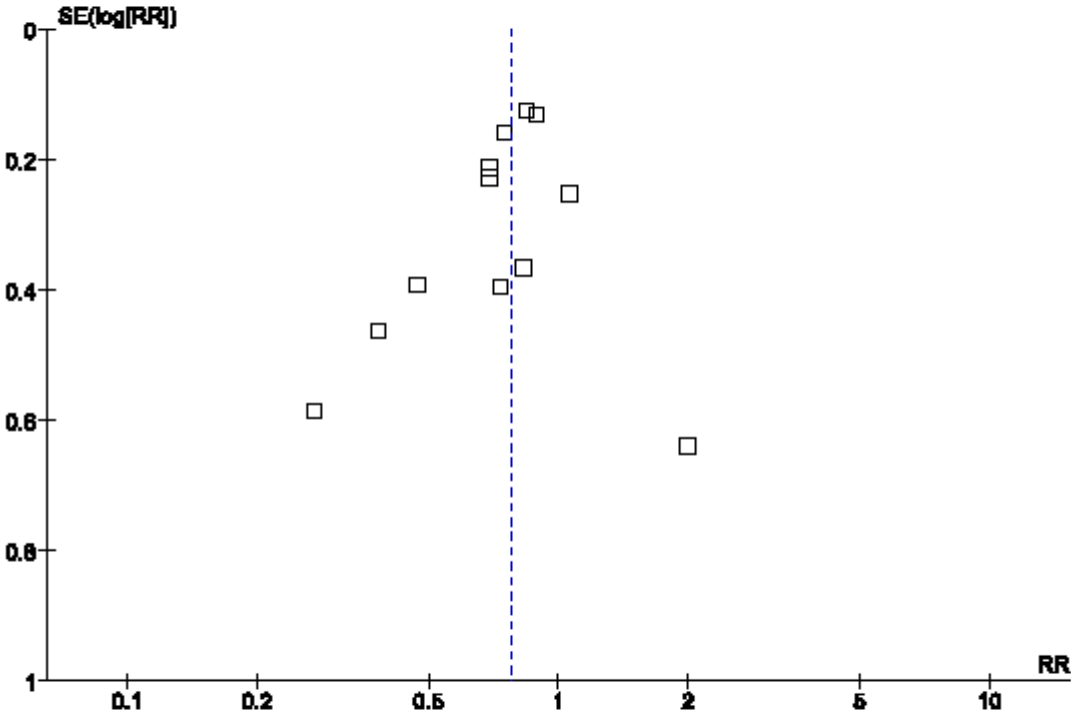

Supplement: Supplementary file 1 [file 10-1160-th10-10-0660-supp.pdf]
